# Supplementary material
Source: ML conference proceedings conference paper supplement (https://openreview.net/forum?id=TsddBd30UA)

# Seg-R1: Segmentation Can Be Surprisingly Simple with Reinforcement Learning

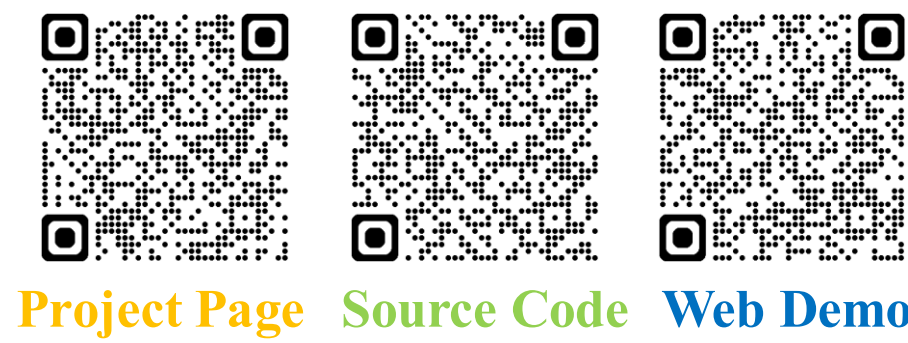

have fun :)

Zuyao You<sup>1</sup>  
<sup>1</sup>Fudan University

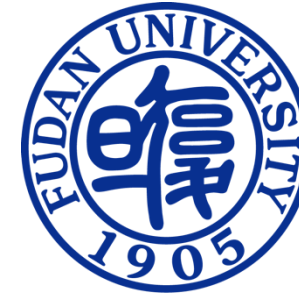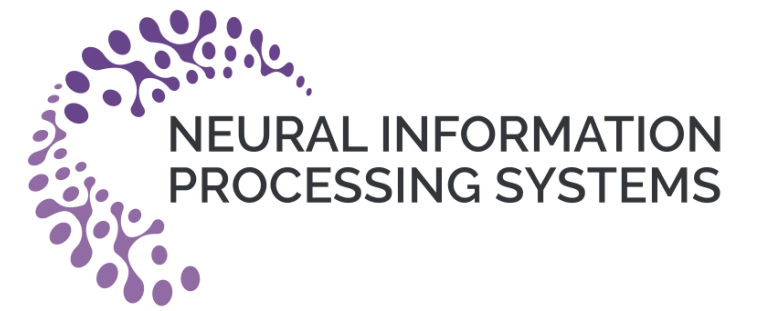

## Introduction

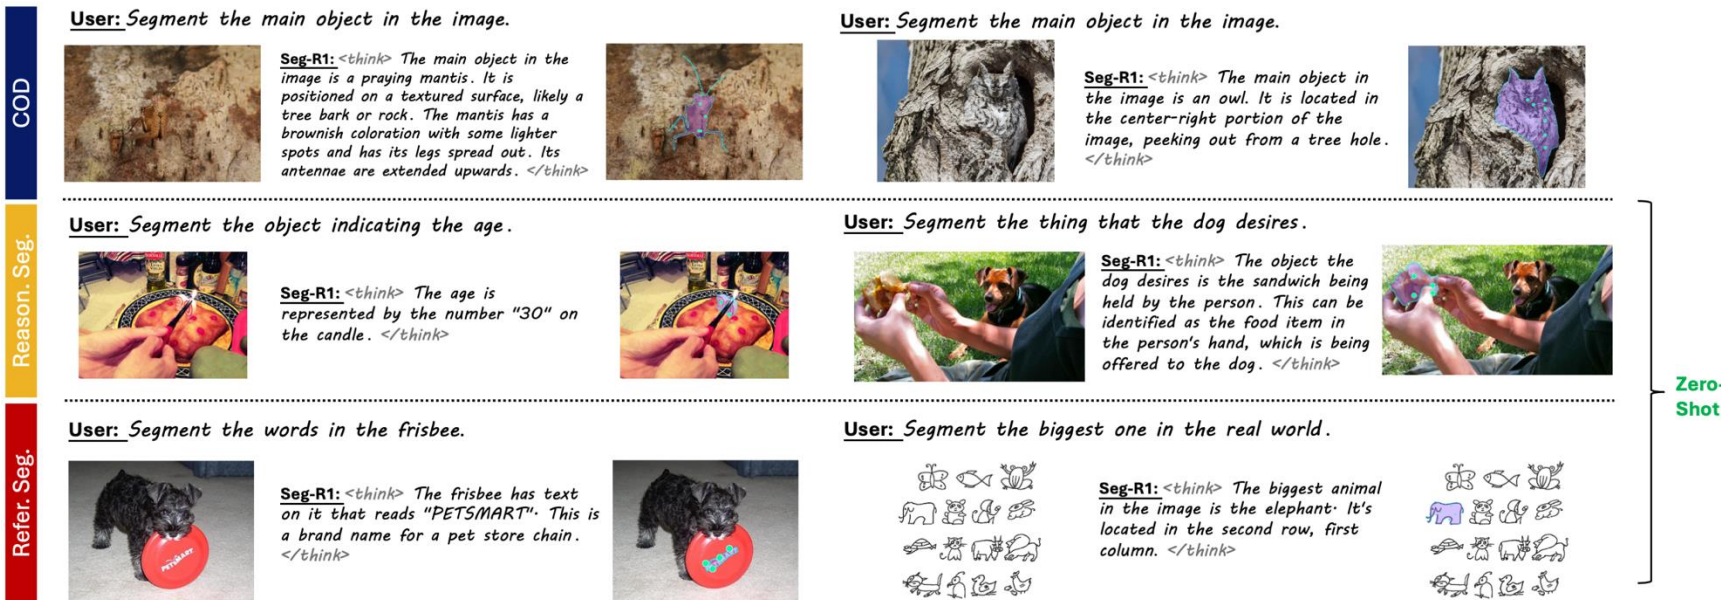

**TL;DR:** In this paper, we explore how to endow large language models (LLMs) with open-world segmentation capabilities using **purely reinforcement learning**, relying solely on foreground segmentation data **without any textual labels**.

Large multimodal models (LMMs) have made rapid progress in image understanding, yet their pixel-level comprehension remains limited. Existing approaches typically introduce special segmentation tokens or rely on large-scale supervised fine-tuning with dense annotations, which breaks architectural simplicity and restricts scalability.

### Key Contributions

- We propose **Seg-R1**, a simple yet effective RL-based framework for pixel-level comprehension in LMM;
- We introduce the **FCoT**, comprising 1,500 manually annotated mask prompts, which provides a valuable resource for prompt-guided segmentation;
- Through comprehensive experiments, we demonstrate that pure RL training equips LMM with strong segmentation capabilities while preserving their original visual comprehension ability, outperforming SFT in terms of generalization and efficiency.

## Method

### GRPO for Segmentation

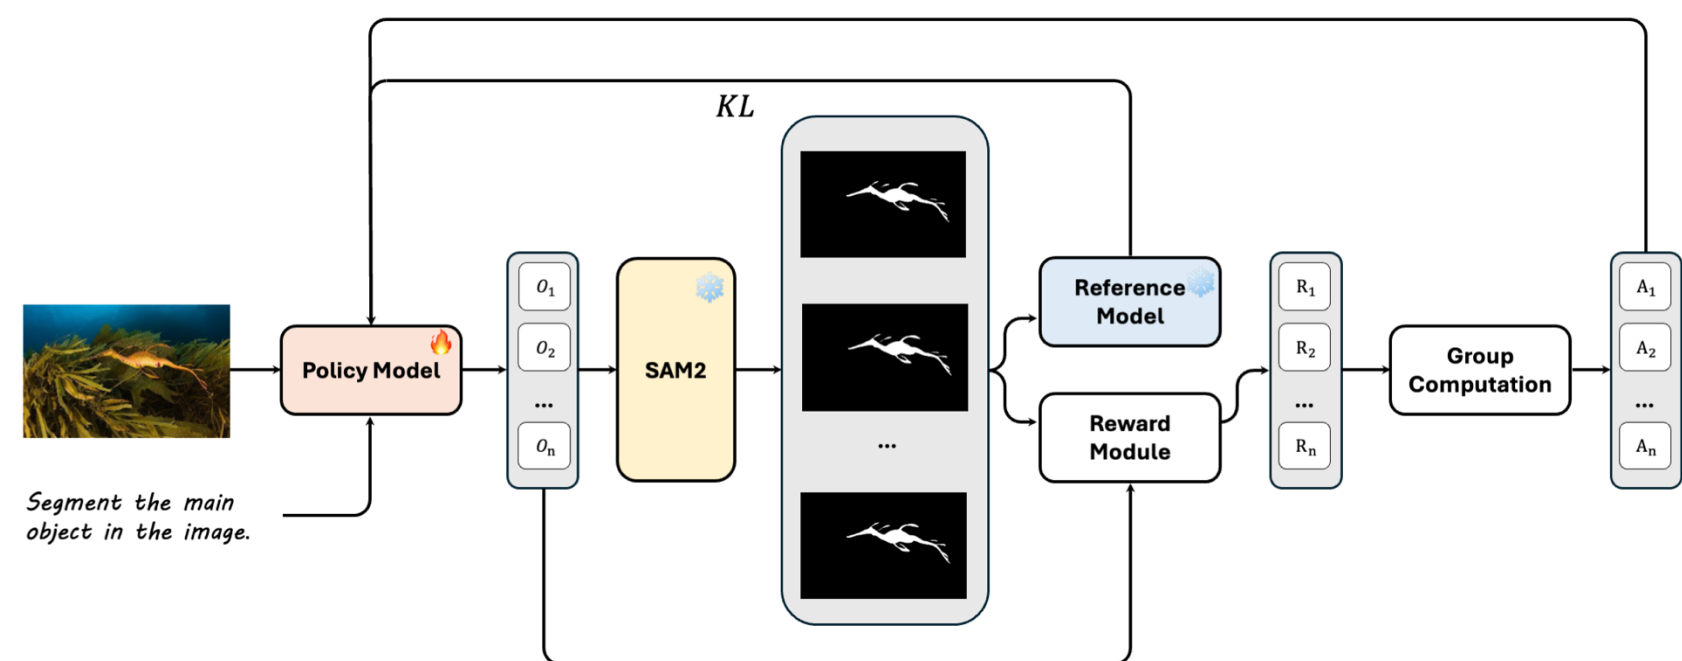

We introduce Seg-R1, a new RL-driven paradigm that equips large multimodal models with pixel-level segmentation capabilities. we adopt a two-stage RL training strategy using GRPO, guiding the model to output explicit reasoning steps and mask prompts, while a reward function combining format constraints, IoU, and S-Measure ensures both global accuracy and fine-grained structural fidelity.

### FCoT

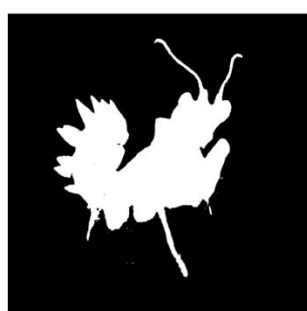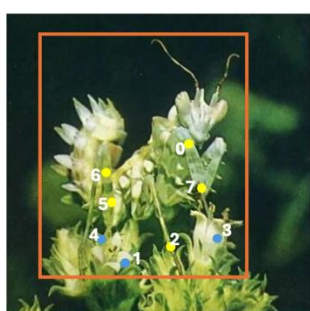

<think>Okay, let me examine the image. The target is a spiny flower mantis, located centrally. It's perched on a plant with green leaves and light-colored, spiky flowers. Hmm, this is a tricky one. The main challenge is the mantis's incredible camouflage. Its body, with its green, white, and spiky parts, blends almost perfectly with the plant it's on, making it very hard to distinguish its exact outline. I'll need to be extremely careful to trace its thin antennae and legs, and to separate its spiky body from the similarly shaped foliage around it.</think>

<bbox>[106, 37, 587, 666]</bbox>,<br><points>[[432,332], [292,628],..., [475,450]]</points>,<br><labels>[1,0,...,1] </labels>.

To compare RL with supervised fine-tuning (SFT), we construct the **Foreground Chain-of-Thought (FCoT)** dataset as a cold-start resource for SFT. FCoT contains 1,500 re-annotated image-mask pairs, each fitted using SAM2 with standardized mask prompts and step-by-step thinking process.

## Experiment

### In-domain Tasks

Table 2: Results on Salient Object Detection (SOD).  $\diamond$  indicates SFT on FCoT as a cold start, **ft** refers the version fine-tune on the DUTS-TR.

|                           | DUT-OMRON [53]        |                      |                     |                | DUTS-TE [51]          |                      |                     |                | HKU-IS [25]           |                      |                     |                | ECSSD [49]            |                      |                     |                |
|---------------------------|-----------------------|----------------------|---------------------|----------------|-----------------------|----------------------|---------------------|----------------|-----------------------|----------------------|---------------------|----------------|-----------------------|----------------------|---------------------|----------------|
|                           | $S_{\alpha} \uparrow$ | $F_{\beta} \uparrow$ | $E_{\phi} \uparrow$ | $M \downarrow$ | $S_{\alpha} \uparrow$ | $F_{\beta} \uparrow$ | $E_{\phi} \uparrow$ | $M \downarrow$ | $S_{\alpha} \uparrow$ | $F_{\beta} \uparrow$ | $E_{\phi} \uparrow$ | $M \downarrow$ | $S_{\alpha} \uparrow$ | $F_{\beta} \uparrow$ | $E_{\phi} \uparrow$ | $M \downarrow$ |
| Mask Supervision Setting  |                       |                      |                     |                |                       |                      |                     |                |                       |                      |                     |                |                       |                      |                     |                |
| EVpV2 [33]                | .862                  | .857                 | .895                | .047           | .915                  | .923                 | .948                | .027           | .932                  | .953                 | .963                | .023           | .935                  | .958                 | .957                | .028           |
| SelfReformer [58]         | .859                  | .838                 | .884                | .043           | .911                  | .916                 | .920                | .026           | .930                  | .947                 | .959                | .024           | .941                  | <b>.963</b>          | .935                | .025           |
| FOCUS [55]                | <b>.868</b>           | .836                 | <b>.900</b>         | .045           | <b>.929</b>           | <b>.928</b>          | <b>.965</b>         | <b>.019</b>    | <b>.935</b>           | .942                 | <b>.974</b>         | <b>.018</b>    | <b>.943</b>           | .954                 | <b>.971</b>         | <b>.018</b>    |
| Weakly Supervised Setting |                       |                      |                     |                |                       |                      |                     |                |                       |                      |                     |                |                       |                      |                     |                |
| HSS [7]                   | —                     | —                    | —                   | .050           | .837                  | .807                 | —                   | .050           | .887                  | .892                 | —                   | .038           | .886                  | .899                 | —                   | .051           |
| A2S [63]                  | .719                  | .841                 | .069                | —              | .750                  | .860                 | .065                | —              | .887                  | .937                 | .042                | —              | .888                  | .911                 | .064                | —              |
| A2SV3 [57]                | —                     | .759                 | .868                | .062           | —                     | .816                 | .906                | .047           | —                     | .908                 | .954                | .033           | —                     | .923                 | .951                | .038           |
| Prompt-Guided Setting     |                       |                      |                     |                |                       |                      |                     |                |                       |                      |                     |                |                       |                      |                     |                |
| Grounded SAM2 [44]        | .708                  | .590                 | .744                | .102           | .800                  | .748                 | .833                | .078           | .825                  | .842                 | .864                | .069           | .845                  | .849                 | .871                | .078           |
| Seg-R1-3B $\diamond$      | .837                  | .789                 | .878                | .048           | .861                  | .848                 | .856                | .048           | .780                  | .818                 | .820                | .077           | .881                  | .871                 | .901                | .052           |
| Seg-R1-3B                 | .852                  | .821                 | .890                | .045           | .866                  | .863                 | .899                | .045           | .772                  | .814                 | .809                | .078           | .882                  | .908                 | .903                | .050           |
| Seg-R1-3B (ft)            | .868                  | .839                 | .906                | .047           | .909                  | .914                 | .942                | .031           | .890                  | .914                 | .925                | .041           | .916                  | .939                 | .940                | .036           |
| Seg-R1-7B (ft)            | <b>.878</b>           | <b>.850</b>          | <b>.911</b>         | <b>.045</b>    | <b>.925</b>           | <b>.922</b>          | <b>.953</b>         | <b>.025</b>    | <b>.935</b>           | <b>.950</b>          | <b>.966</b>         | <b>.022</b>    | <b>.939</b>           | <b>.956</b>          | <b>.962</b>         | <b>.025</b>    |

### Out-of-domain Tasks

Table 3: Results on referring segmentation.

|                      | RefCOCO     |             |             | RefCOCO+    |             |             | RefCOCOg    |             |
|----------------------|-------------|-------------|-------------|-------------|-------------|-------------|-------------|-------------|
|                      | testA       | testB       | val         | testA       | testB       | val         | test        | val         |
| LAVT [63]            | 75.8        | 68.8        | 72.7        | 68.4        | 55.1        | 62.1        | 66.0        | 65.0        |
| X-Decoder [78]       | —           | —           | —           | —           | —           | —           | —           | 64.6        |
| SEEM [79]            | —           | —           | —           | —           | —           | —           | —           | 65.7        |
| LISA-7B [24]         | 76.5        | 71.1        | 74.1        | 67.5        | 56.5        | 62.4        | 68.5        | 66.4        |
| PixelLM-7B [53]      | 76.5        | 68.2        | 73.0        | <b>71.7</b> | 58.3        | <b>66.3</b> | 70.5        | 69.3        |
| OMG-LLaVA-7B [71]    | <b>77.7</b> | <b>71.2</b> | <b>75.6</b> | 69.7        | <b>58.9</b> | 65.6        | 70.2        | 70.7        |
| Seg-R1-3B $\diamond$ | 65.8        | 54.7        | 58.7        | 56.2        | 45.0        | 49.1        | 57.0        | 57.9        |
| Seg-R1-3B            | 76.0        | 64.9        | 69.9        | 66.8        | 50.9        | 59.1        | 67.9        | 67.3        |
| Seg-R1-7B            | <b>78.7</b> | 67.6        | <b>74.3</b> | <b>70.9</b> | 57.9        | 62.6        | <b>71.4</b> | <b>71.0</b> |

Table 4: Results on ReasonSeg.

|                      | val         |             | test        |             |
|----------------------|-------------|-------------|-------------|-------------|
|                      | gIoU        | clIoU       | gIoU        | clIoU       |
| OVSeg [30]           | 28.5        | 18.6        | 26.1        | 20.8        |
| GRES [32]            | 22.4        | 19.9        | 21.3        | 22.0        |
| X-Decoder [78]       | 22.6        | 17.9        | 21.7        | 16.3        |
| SEEM [79]            | 25.5        | 21.2        | 24.3        | 18.7        |
| Grounded-SAM [34]    | 26.0        | 14.5        | 21.3        | 16.4        |
| LISA-7B [24]         | 44.4        | 46.0        | 36.8        | 34.1        |
| Seg-R1-3B $\diamond$ | 50.3        | 35.5        | 42.4        | 30.0        |
| Seg-R1-3B            | <b>60.8</b> | <b>56.2</b> | <b>55.3</b> | <b>46.6</b> |
| Seg-R1-7B            | <b>58.6</b> | 41.2        | <b>56.7</b> | <b>53.7</b> |

### Single object referring segmentation in the wild

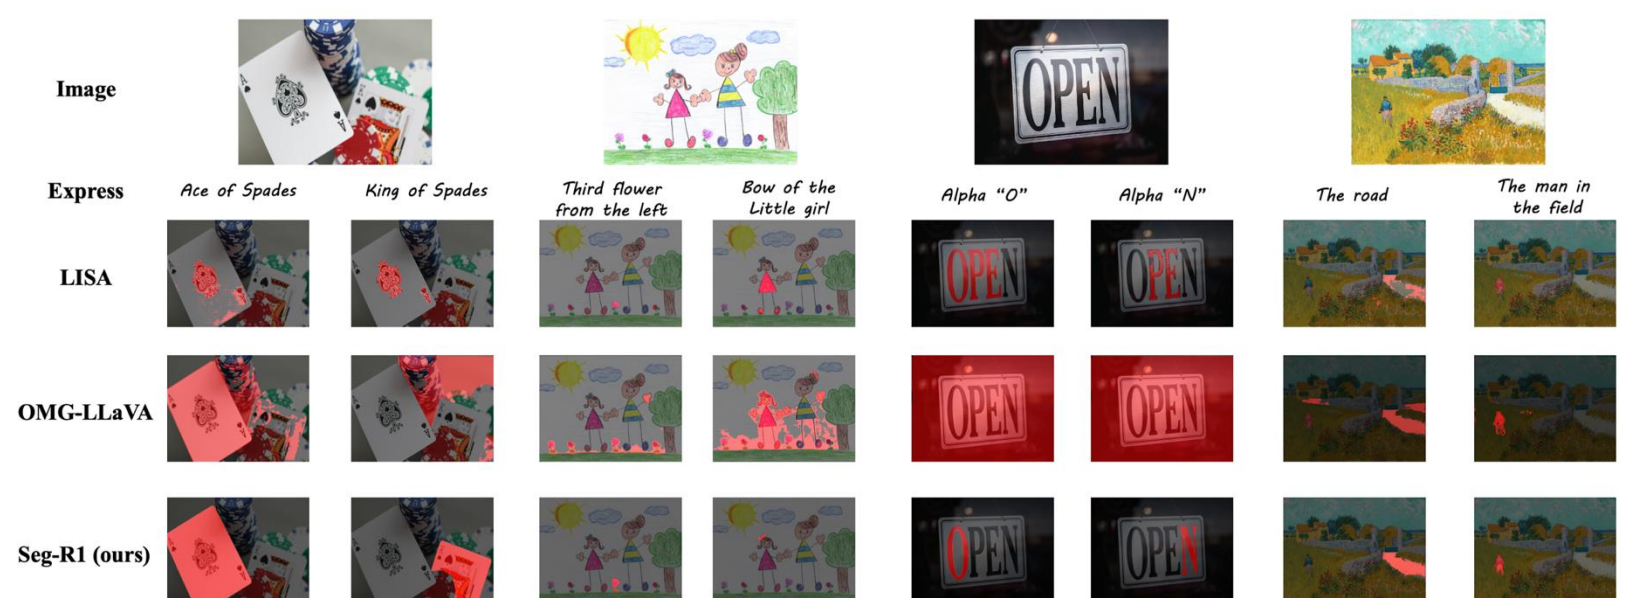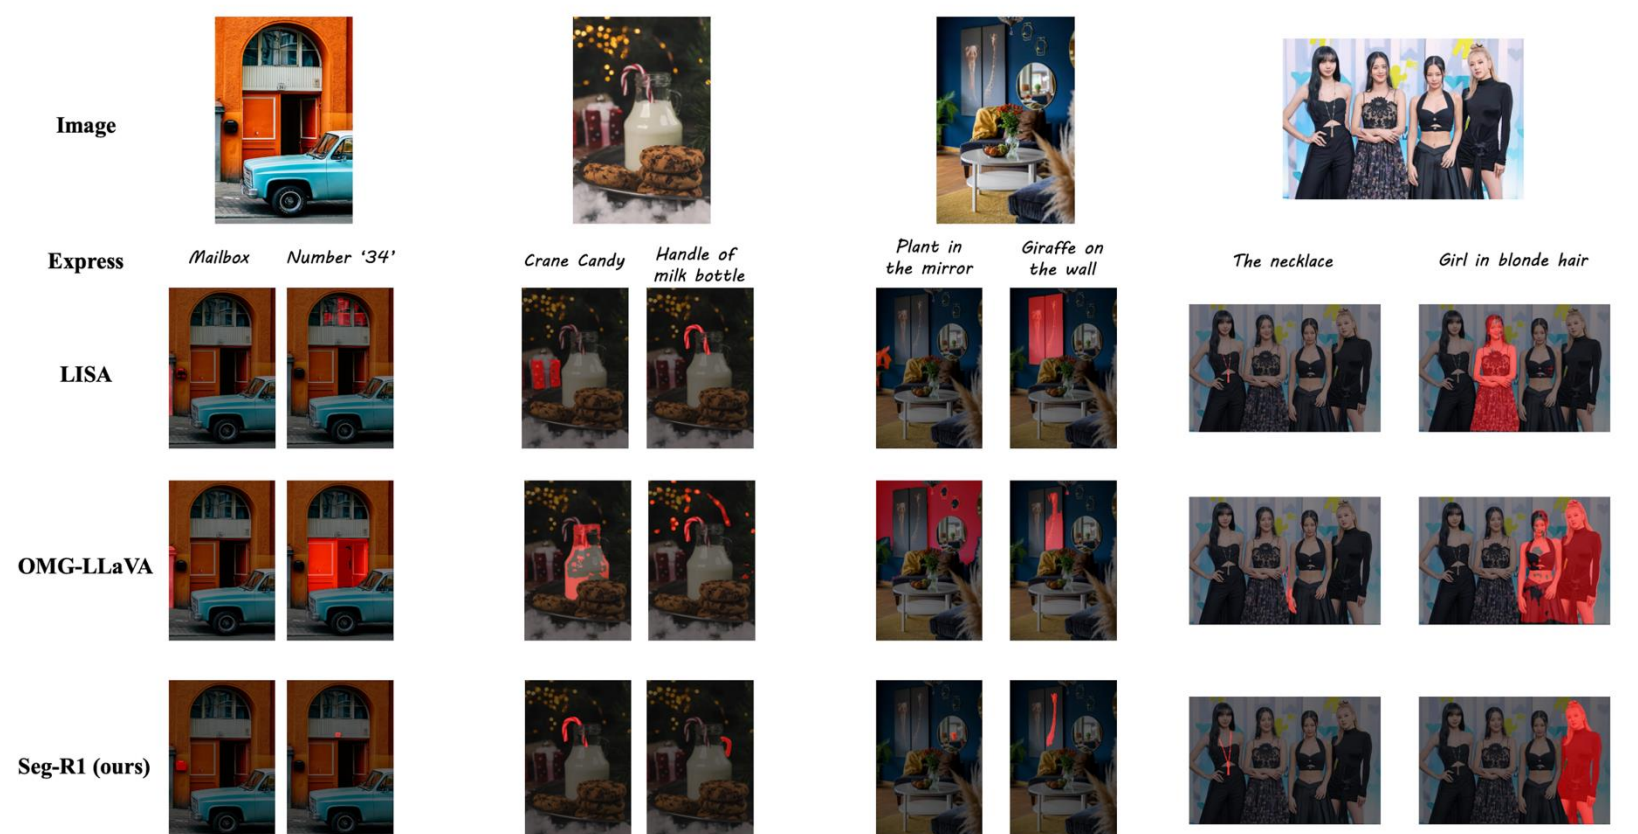

### Multiple objects referring segmentation in the wild

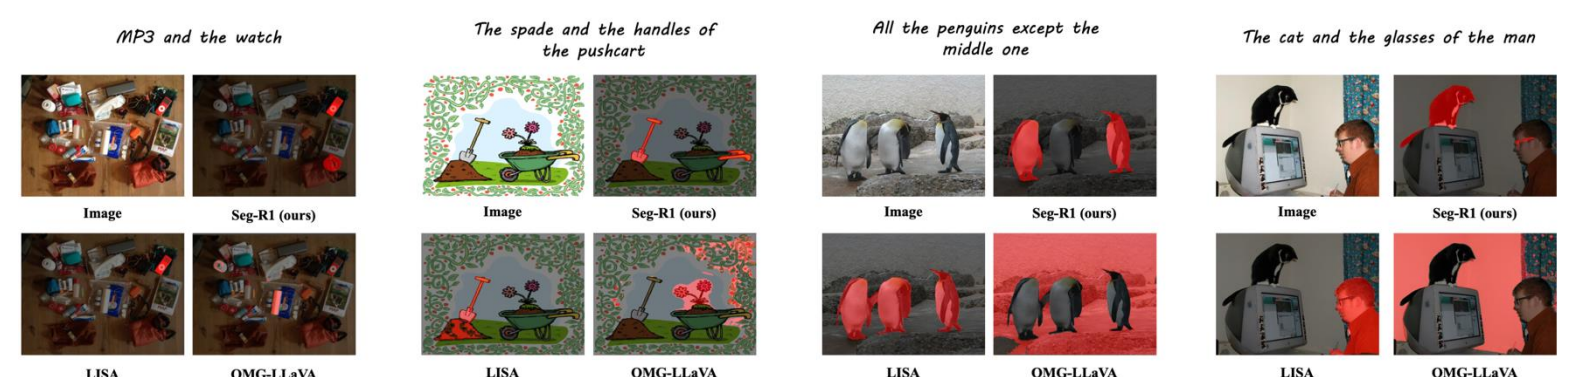

- The training curve of segmentation reward.

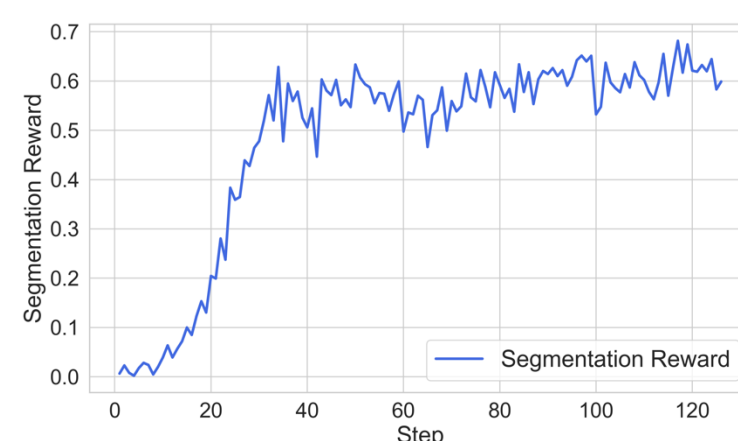

- Comparison on General VLM Benchmarks

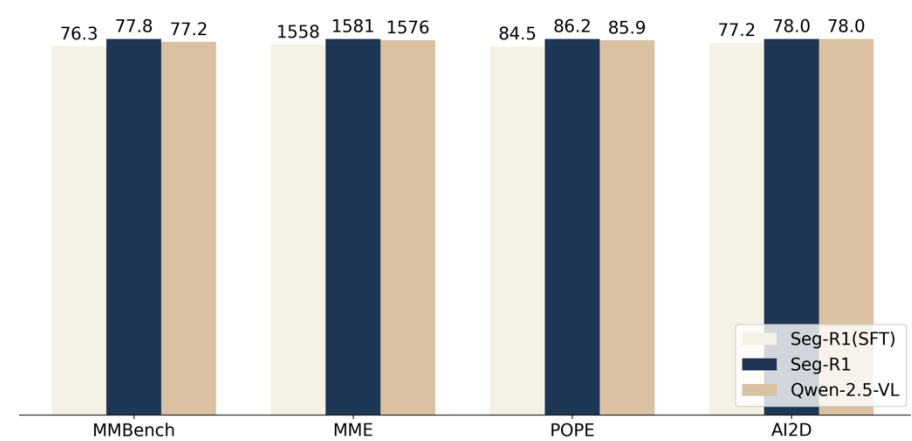

Supplement: supplementary_material [file attachment]
